# Supplementary material for: Exploring the Relationship Among Divergence Time and Coding and Non-coding Elements in the Shaping of Fungal Mitochondrial Genomes
Source: Front Microbiol. 2020 Apr 29;11:765. doi: 10.3389/fmicb.2020.00765 (PMC7202290; doi:10.3389/fmicb.2020.00765)
Supplement: TABLE S4 — Overview of intron sharing analysis based on gene position for the species evaluated in this study. [file Table_4.XLSX]

## Sheet: Planilha1
Gene	Intron Id	Species with the same intron position	Reference Specie
nad5	intron_nad5_pos1_24	Fusarium culmorum, F. gerlachii	Fusarium gerlachii
nad5	intron_nad5_pos2_762	Clonostachys rosea, Epicloe typhina, Fusarium culmorum, F. gerlachii, F. solani, F. oxysporum, F.graminearum	Epichloe typhina
nad2	intron_nad2_pos1_519	Fusarium culmorum, F. gerlachii, F. graminearum	Fusarium culmorum
nad2	intron_nad2_pos2_688	Fusarium circinatum, F. culmorum, F. graminearum, F. gerlachii	Fusarium circinatum
nad2	intron_nad2_pos3_2309	Fusarium gerlachi, F. graminearum, F. culmorum	Fusarium culmorum
nad2	intron_nad2_pos4_3128	Epichloe festucae, Epichloe typhina	Epichloe typhina
nad3	intron_nad3_pos1_76	Fusarium gerlachi, F. graminearum, F. culmorum	Fusarium culmorum
nad3	intron_nad3_pos2_493	Fusarium gerlachi, F. graminearum, F. culmorum, Epichloe festucae	Fusarium gerlachii
atp6	intron_atp6_pos1_566	Fusarium gerlachi, F. graminearum, F. culmorum, F.solani	Fusarium gerlachii
cox3	intron_cox3_pos1_922	Fusarium culmorum, F. gerlachii, F.circinatum	Fusarium culmorum
cox3	intron_cox3_pos2_1387	Fusarium gerlachi, F. graminearum, F. culmorum, F.solani	Fusarium graminearum
cox3	intron_cox3_pos3_4459	Fusarium culmorum, F. solani, Hypomyces aurantius	Hypomyces aurantius
cox2	intron_cox2_pos1_554	Fusarium gerlachii, F. graminearum	Fusarium gerlachii
cox2	intron_cox2_pos2_2259	Epichloe festucae, Nectria cinnabarina	Epichloe festucae
cox2	intron_cox2_pos3_3043	Fusarium culmorum, F. graminearum	Fusarium culmorum
cox2	intron_cox2_pos4_7120	Fusarium culmorum, F. graminearum	Fusarium culmorum
cox1	intron_cox1_pos1_486	Epichloe festucae, Fusarium graminearum	Epichloe festucae
cox1	intron_cox1_pos2_498	Fusarium graminearum, Hirsutella minesotensis, H. rhossiliensis, Hypomyces aurantius	Hirsutella minnesotensis
cox1	intron_cox1_pos3_733	Fusarium circinatum, F. culmorum	Fusarium circinatum
cox1	intron_cox1_pos4_955	Acremonium chrysogenum, Beauveria caledonica, Clonostachys rosea	Acremonium chrysogenum
cox1	intron_cox1_pos5_1641	Hirsutella minnesotensis, H. rhossiliensis, Hypomyces aurantius, Nectria cinnabarina	Nectria cinnabarina
cox1	intron_cox1_pos6_2226	Fusarium gerlachi, F. graminearum, F. culmorum	Fusarium culmorum
cox1	intron_cox1_pos7_2530	Cordyceps brongniartii, Fusarium culmorum	Cordyceps brongniartii
cox1	intron_cox1_pos8_2713	Beauveria caledonica, B. malawiensis	Beauveria caledonica
cox1	intron_cox1_pos9_2972	Hirsutella rhossiliensis, Trichoderma reesei	Hirsutella rhossiliensis
cox1	intron_cox1_pos10_4013	Fusarium culmorum, F. gerlachii	Fusarium gerlachii
cox1	intron_cox1_pos11_4240	Beauveria malawiensis, Epichloe typhina, Hirsutella verticillioides	Beauveria malawiensis
cox1	intron_cox1_pos12_4985	Epichloe typhina, Nectria cinnabarina	Epichloe typhina
cox1	intron_cox1_pos13_5129	Fusarium circinatum, F. culmorum, F. graminearum, F. gerlachii, F. solani	Fusarium circinatum
cox1	intron_cox1_pos14_6512	Trichoderma hamatum, T. reesei	Trichoderma reesei
cox1	intron_cox1_pos15_6730	Fusarium circinatum, F. culmorum, F. graminearum, F. gerlachii	Fusarium graminearum
cox1	intron_cox1_pos16_7585	Epichloe typhina, Fusarium circinatum, F. solani, F. verticillioides, Hirsutella minnesotensis, Hypomyces aurantius	Fusarium circinatum
cox1	intron_cox1_pos17_8684	Fusarium culmorum, F. solani	Fusarium solani
cox1	intron_cox1_pos18_11452	Fusarium gerlachii, F. graminearum	Fusarium graminearum
cox1	intron_cox1_pos19_12622	Fusarium gerlachi, F. graminearum, F. culmorum, Trichoderma reesei	Fusarium graminearum
cox1	intron_cox1_pos20_15142	Fusarium culmorum, F. gerlachii	Fusarium culmorum
cox1	intron_cox1_pos21_17287	Clonostachys rosea, Epichloe typhina, Fusarium circinatum, F. culmorum, F. graminearum, F. gerlachii	Fusarium culmorum
cob	intron_cob_pos1_3196	Beauveria bassiana, B. caledonica, B. malawiensis, Epichloe festucae	Epichloe festucae
cob	intron_cob_pos2_4277	Hirsutella rhossiliensis, H. vermicola, H. minnesotensis, Trichoderma reesei, T. harzianum, Hypomyces aurantius, Fusarium culmorum, F. gerlachii, F. graminearum	Fusarium gerlachii
cob	intron_cob_pos3_4368	Epichloe typhina, Fusarium gerlachii, F. graminearum, Trichoderma reesei	Epichloe typhina
cob	intron_cob_pos4_6154	Epichloe typhina, Fusarium circinatum	Epichloe typhina
cob	intron_cob_pos5_6612	Fusarium gerlachii, F.graminearum	Fusarium gerlachii
cob	intron_cob_pos6_8714	Epichloe festucae, E. typhina, Fusarium culmorum, F. gerlachii, Hirsutella rhossiliensis	Fusarium circinatum
cob	intron_cob_pos7_9437	Fusarium gerlachii, F.graminearum	Fusarium graminearum
rrnl	intron_rrnl_pos1_778	Cordyceps brongniartii, Epichloe typhina	Cordyceps brongniartii
rrnl	intron_rrnl_pos2_2366	Lecanicillium saksenae, L. muscarium	Lecanicillium saksenae
rrnl	intron_rrnl_pos3_2467	Beauveria caledonica, B. malawiensis	Beauveria caledonica
rrnl	intron_rrnl_pos4_2922	Fusarium culmorum, F. graminearum, F. verticillioides, F. gerlachii	Fusarium culmorum
rrnl	intron_rrnl_pos5_2653	Trichoderma atroviride, T. hamatum	Trichoderma atroviride
